# Supplementary material for: Post-Crash Trauma Care: First-Responder Training for the Traffic Police in Makwanpur, Nepal; A Pre and Post-Intervention Cross-Sectional Survey
Source: Research Square preprint supplement (doi:10.21203/rs.3.rs-113013/v1), 2020-11-24
Supplement: Supplementary file 1 [file 190a856948e8c574d4f43606.docx]

Additional File 3: Pre and post-training questionnaire

*Please circle the correct answers from the given options. Participants may need to circle multiples answers if needed.*

**First Responder’s Name:** _________________________

| **SECTION 1: KNOWLEDGE RELATED QUESTIONS** | | | | | |
| --- | --- | --- | --- | --- | --- |
| 1. **As per the pillars mentioned in the Nepal Road Safety Action Plan, which pillars mention the roles of volunteers in first aid and road safety?**    1. Road Safety Management    2. Safer roads and mobility    3. Safer vehicles    4. **Safer road users**    5. **Post-crash response** | | | | | |
| 1. **Why is first aid important in road crashes?** 2. To examine the injured person 3. To ensure safety in crash site 4. **To save life of injured person** 5. To bring changes in the health of communities through medical treatment 6. None of the above | | | | | |
| 1. **How do you support injured person in road crashes?** 2. Provide safety in crash site, provide first aid to injured person, transfer injured person, check the vital signs of injured person 3. **Provide safety in crash site, check the vital signs of injured person, provide first aid to injured person, transfer the injured person** 4. Provide first aid to injured person, check the vital signs of injured person, provide safety in crash site, transfer the injured person 5. Check the vital signs of injured person, provide first aid to injured person, transfer the injured person, provide safety in crash site 6. None of the above | | | | | |
| 1. **Which is not included in patient assessment?**    1. Scene assessment    2. Check for dangers    3. Check airway, breathing and circulation    4. **Immediately taking to hospital** | | | | | |
| 1. **How can you open the airway?**    1. Opening mouth    2. Cleaning nose    3. **Head tilt and chin lift**    4. Ask to cough | | | | | |
| 1. **How can you check a person is breathing?**    1. Ask people to breathe    2. Ask people to blow    3. As people to cough    4. **Look, listen and feel for breathing** | | | | | |
| 1. **When doing CPR, what is the ratio of rescue breathing and chest compressions for the adult?**    1. 20:3    2. 30:3    3. **30:2**    4. Don’t know | | | | | |
| 1. **Which of the following is the correct order to provide first aid to an injured person with severe bleeding?**    1. Keep injured person in a comfortable position, raise the body part that is bleeding, press, tie bandage, treatment of shock, take the injured to hospital    2. Raise the body part that is bleeding, keep injured person in a comfortable position, press, tie bandage, treatment of shock, take the injured to hospital    3. **Press the bleeding part, keep injured person in a comfortable position, apply dressing, treatment of shock, take the injured to hospital**    4. Treatment of shock, press the bleeding part, keep injured person in a comfortable position, raise the body part that is bleeding, apply pressure indirectly, tie bandage, take the injured to hospital    5. None of the above | | | | | |
| 1. **What components need to apply when providing psychological first aid?**     1. Preparation    2. Observation    3. Active listening    4. Linkage    5. **All of the above** | | | | | |
| 1. **Which of the following indicate a spinal injury?**    1. Back swelling in the midline of the back    2. Back pain in the midline of the back    3. Loss of feeling or movement in the legs    4. **All of the above** | | | | | |
| 1. **What complications will occur when a person with head and spinal injury is not treated on time?**    1. Probability of hand fracture    2. **Partial paralysis may occur**    3. **Complete paralysis**    4. Severe bleeding might occur    5. None of the above | | | | | |
| 1. **What are the symptoms of the muscle injury?**    1. **Pain**    2. **Swelling**    3. **Hard to walk**    4. Loss of feeling or movement in the limbs | | | | | |
| 1. **Which of the following are the signs and symptoms of shock?**    1. **Pale face**    2. **Irregular pulse rate**    3. **Sweating**    4. Fever    5. None of the above | | | | | |
| 1. **What should not you do with a patient in shock?**    1. Lay them down    2. **Raise their legs**    3. Keep them warm, cover with a blanket    4. **Give them to eat and drink** | | | | | |
| 1. **Which of the following is a sign of a broken bone?**    1. Pain and swelling    2. Loss of movement    3. Irregular angulation of the limb    4. **All of the above** | | | | | |
| 1. **When would you apply a tourniquet?**    1. **When a limb has become amputated or heavy arterial bleeding if not controlled by direct pressure**    2. With small cuts and grazes    3. With burns    4. With snake bites | | | | | |
| 1. **Which triage tag do you use to correctly categorise injured person who has catastrophic bleeding from his/her hand?**    1. Green tag    2. **Red tag**    3. Green tag first and then red tag    4. Use both tags together    5. None of the above | | | | | |
| **SECTION 2: CONFIDENCE RELATED QUESTIONS** | | | | | |
|  | **Extremely unconfident** | **Not confident** | **Neutral** | **Confident** | **Very confident** |
| 1. How confident are you at performing CPR? | 1 | 2 | 3 | 4 | 5 |
| 1. How confident are you with using dressings and tourniquets? | 1 | 2 | 3 | 4 | 5 |
| 1. How confident are you at moving and handling patients? | 1 | 2 | 3 | 4 | 5 |
| 1. How confident are you with managing broken bones? | 1 | 2 | 3 | 4 | 5 |
| 1. How confident are you at putting a casualty in the recovery position? | 1 | 2 | 3 | 4 | 5 |

***End***
